# Supplementary material for: Controlled synthesis of three-dimensional CoNi microstructures composed of single crystal CoNi nanoleaves
Source: Royal Society of Chemistry journal article supplement (doi:10.1039/c2ce06383b), 2012-01-01
Supplement: c2ce06383b.pdf [file c2ce06383b.pdf]

## Electronic supplementary information(ESI)

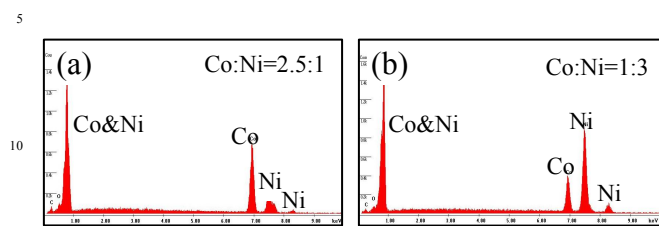

15 Fig. S1. Typical EDS patterns of irregularly-shaped 3D architectures (a) and microspheres (b).

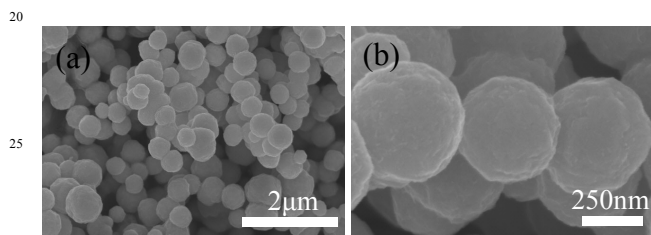

20 Fig. S2. SEM images of the sample prepared by using  $\text{NaH}_2\text{PO}_2$  as reducing agent.

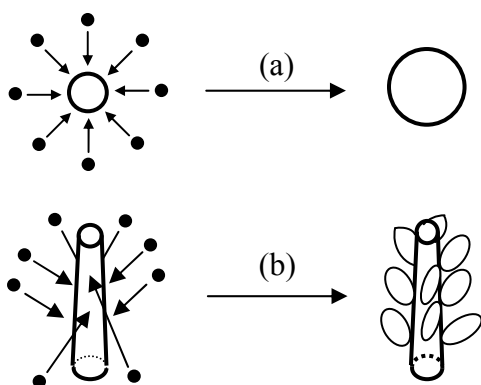

55 Fig. S3. A rough illustration of the formation of microspheres (a) and wheat-ear-like microstructures (b).

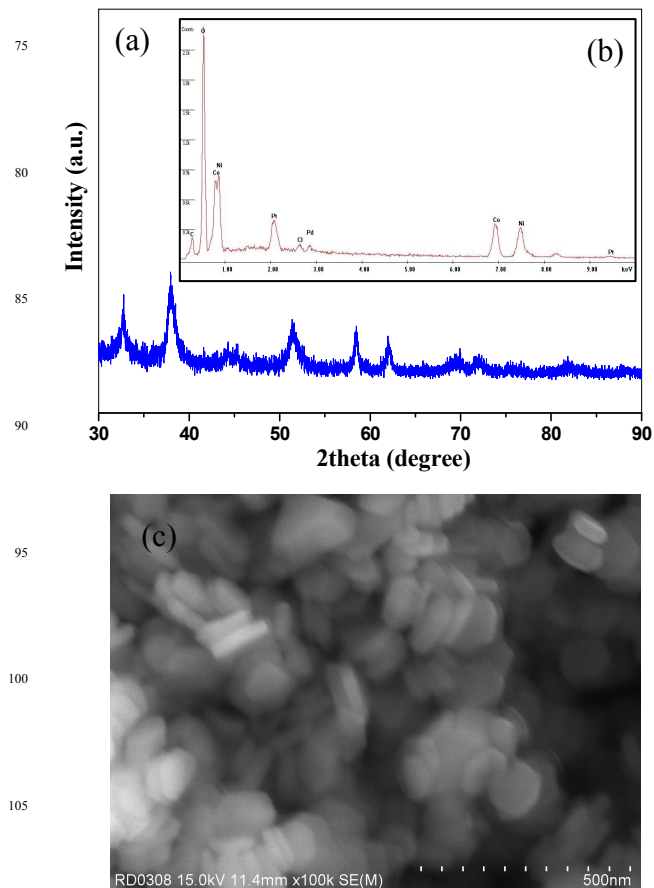

110 Fig. S4. XRD pattern (a), EDS pattern (b) and SEM image (c) of the sample obtained at reaction time of 20 min in the absence of sodium citrate.
